# Supplementary material for: Perception and Attitude toward Teleconsultations among Different Healthcare Professionals in the Era of the COVID-19 Pandemic
Source: Int J Environ Res Public Health. 2022 Sep 13;19(18):11532. doi: 10.3390/ijerph191811532 (PMC9517420; doi:10.3390/ijerph191811532)
Supplement: Supplementary file 1 [file ijerph-19-11532-s001.zip › Supplementary File S2 ¿C Additional tables.pdf]

**Table S1.** The use of teleconsultation by Polish HCPs before, during and after the COVID-19 pandemic

| Variable                                                                                                 | Categories                   | n   | %    | $\chi^2$<br>Cramer's V | df | p     |
|----------------------------------------------------------------------------------------------------------|------------------------------|-----|------|------------------------|----|-------|
| The preferred way of working during COVID-19 pandemic                                                    | Teleconsultation             | 388 | 50.5 | 0.06                   | 1  | 0.801 |
|                                                                                                          | Personal visit               | 381 | 49.5 | 0.009                  |    |       |
| Did you work before the COVID-19 pandemic using teleconsultation?                                        | Yes                          | 240 | 31.0 | 111.67                 | 1  | 0     |
|                                                                                                          | No                           | 534 | 69.0 | 0.380                  |    |       |
| Do you have access to the results of laboratory tests, imaging tests, etc. during the teleconsultation?  | Always                       | 146 | 19.5 | 463.89                 | 4  | 0     |
|                                                                                                          | Often                        | 374 | 49.9 | 0.394                  |    |       |
|                                                                                                          | Occasionally                 | 119 | 15.9 |                        |    |       |
|                                                                                                          | Rarely                       | 43  | 5.7  |                        |    |       |
|                                                                                                          | Never                        | 67  | 8.9  |                        |    |       |
| How long does it take you to conduct a teleconsultation?                                                 | The same as a personal visit | 247 | 33.4 | 93.7                   | 2  | 0     |
|                                                                                                          | Less than a personal visit   | 354 | 47.8 | 0.252                  |    |       |
|                                                                                                          | More than a personal visit   | 139 | 18.8 |                        |    |       |
| After the end of the COVID-19 pandemic, do you intend to use teleconsultation in your professional work? | Yes, often                   | 202 | 26.5 | 403.97                 | 3  | 0     |
|                                                                                                          | Yes, occasionally            | 407 | 53.4 | 0.420                  |    |       |
|                                                                                                          | No                           | 121 | 15.9 |                        |    |       |
|                                                                                                          | I have no opinion            | 32  | 4.2  |                        |    |       |

**Note.**  $\chi^2$  – the homogeneity test; Cramers' V- a coefficient determining the level of dependence between two nominal variables, df – number of degrees of freedom, p - calculated significance level (value 0 means  $p < 0.001$ )

**Table S2.** Availability to the test results during teleconsultation depending on the profession and specialization.

| Variable                       | Categories        | Availability to the test results during teleconsultation |      |     |      |    |      |    |      |    |      | Fisher's test |
|--------------------------------|-------------------|----------------------------------------------------------|------|-----|------|----|------|----|------|----|------|---------------|
|                                |                   | n                                                        | %    | n   | %    | n  | %    | n  | %    | n  | %    | Cramer's V    |
| <b>Profession</b>              | Doctor            | 123                                                      | 22.7 | 315 | 58.2 | 72 | 13.3 | 14 | 2.6  | 17 | 3.1  | 0             |
|                                | Nurse             | 17                                                       | 12.7 | 41  | 30.6 | 27 | 20.1 | 15 | 11.2 | 34 | 25.4 | 0.245         |
|                                | Physiotherapist   | 1                                                        | 4.3  | 5   | 21.7 | 3  | 13.0 | 6  | 26.1 | 8  | 34.8 |               |
|                                | Paramedic         | 0                                                        | 0.0  | 6   | 25.0 | 9  | 37.5 | 5  | 20.8 | 4  | 16.7 |               |
|                                | Midwife           | 5                                                        | 18.5 | 7   | 25.9 | 8  | 29.6 | 3  | 11.1 | 4  | 14.8 |               |
| <b>Medical specialization*</b> | Family medicine   | 68                                                       | 26.2 | 168 | 64.6 | 19 | 7.3  | 1  | 0.4  | 4  | 1.5  | 0             |
|                                | Internal diseases | 7                                                        | 13.7 | 22  | 43.1 | 10 | 19.6 | 3  | 5.9  | 9  | 17.6 | 0.244         |
|                                | Pediatrics        | 5                                                        | 18.5 | 15  | 55.6 | 5  | 18.5 | 2  | 7.4  | 0  | 0.0  |               |
|                                | Cardiology        | 3                                                        | 14.3 | 7   | 33.3 | 5  | 23.8 | 3  | 14.3 | 3  | 14.3 |               |
|                                | Hematology        | 2                                                        | 20.0 | 7   | 70.0 | 1  | 10.0 | 0  | 0.0  | 0  | 0.0  |               |
|                                | Anesthesiology    | 1                                                        | 9.1  | 2   | 18.2 | 3  | 27.3 | 0  | 0.0  | 5  | 45.5 |               |
|                                | Other             | 14                                                       | 19.4 | 32  | 44.4 | 14 | 19.4 | 5  | 6.9  | 7  | 9.7  |               |

**Note.** p - calculated significance level in Fisher's exact test of independence,  $p = 0$  means that  $p < 0.001$ ; Cramers' V- a coefficient determining the level of dependence between two nominal variables ; \* - the group of respondents was limited to those who indicated only one specialization

**Table S3.** Amount of time used for teleconsultation and personal visit in different age, gender and occupational groups among Polish HCPs.

| Variable                | Categories        | Time used for teleconsultation in relation to a personal visit |      |      |      |      |      | Fisher's test<br>Cramer's V |
|-------------------------|-------------------|----------------------------------------------------------------|------|------|------|------|------|-----------------------------|
|                         |                   | The same                                                       |      | Less |      | More |      | p                           |
|                         |                   | n                                                              | %    | n    | %    | n    | %    |                             |
| Age                     | 20-30 years       | 36                                                             | 30.5 | 72   | 61.0 | 10   | 8.5  | 0.005                       |
|                         | 31-40 years       | 76                                                             | 32.9 | 116  | 50.2 | 39   | 16.9 | 0.117                       |
|                         | 41-50 years       | 64                                                             | 36.0 | 77   | 43.3 | 37   | 20.8 |                             |
|                         | 51-60 years       | 51                                                             | 31.9 | 67   | 41.9 | 42   | 26.2 |                             |
|                         | >60 years         | 20                                                             | 37.7 | 22   | 41.5 | 11   | 20.8 |                             |
| Sex                     | Female            | 194                                                            | 35.5 | 258  | 47.2 | 95   | 17.4 | 0.071                       |
|                         | Male              | 53                                                             | 27.5 | 96   | 49.7 | 44   | 22.8 | 0.084                       |
| Profession              | Doctor            | 207                                                            | 38.3 | 239  | 44.3 | 94   | 17.4 | 0                           |
|                         | Nurse             | 27                                                             | 21.3 | 75   | 59.1 | 25   | 19.7 | 0.149                       |
|                         | Physiotherapist   | 2                                                              | 8.7  | 11   | 47.8 | 10   | 43.5 |                             |
|                         | Paramedic         | 4                                                              | 16.7 | 17   | 70.8 | 3    | 12.5 |                             |
|                         | Midwife           | 7                                                              | 26.9 | 12   | 46.2 | 7    | 26.9 |                             |
| Medical specialization* | Family medicine   | 105                                                            | 40.4 | 122  | 46.9 | 33   | 12.7 | 0.337                       |
|                         | Internal diseases | 20                                                             | 40.8 | 21   | 42.9 | 8    | 16.3 | 0.124                       |
|                         | Pediatrics        | 11                                                             | 40.7 | 11   | 40.7 | 5    | 18.5 |                             |
|                         | Cardiology        | 4                                                              | 19.0 | 15   | 71.4 | 2    | 9.5  |                             |
|                         | Hematology        | 3                                                              | 30.0 | 6    | 60.0 | 1    | 10.0 |                             |
|                         | Anesthesiology    | 4                                                              | 36.4 | 7    | 63.6 | 0    | 0.0  |                             |
|                         | Other             | 20                                                             | 27.8 | 37   | 51.4 | 15   | 20.8 |                             |

**Note.** p - calculated significance level in Fisher's exact test of independence, Cramers' V- a coefficient determining the level of dependence between two nominal variables; p = 0 means that p < 0.001; \* - the group of respondents was limited to those who indicated only one specialization

**Table S4.** The mean, standard deviation, median, values of the first and third quartiles and the confidence interval index for the effectiveness and reliability of the provided tele-advice according to the respondents.

| Variable                                    | n   | M    | SD   | Q.25% | Median | Q.75% | 95% CI    |
|---------------------------------------------|-----|------|------|-------|--------|-------|-----------|
| Effectiveness of conducted teleconsultation | 765 | 6.19 | 2.29 | 5     | 7      | 8     | 6.49-6.99 |
| Reliability of conducted teleconsultation   | 766 | 5.89 | 2.26 | 4     | 6      | 8     | 5.99-6.50 |

**Note.** Ratings on a scale of 1-10 (1 - lowest, 10 - highest). Q.25% - first quartile, Q.75% - third quartile; 95% CI - 95% confidence interval for the (pseudo) median.

**Table S5.** Assessment of the necessary ratio of teleconsultations to personal visits depending on the medical profession and medical specialization of the respondents

| Assessment of the necessary ratio of teleconsultations to personal visits |                   |         |      |         |       |         |      |         |      |         |      |         |      |         |      |         |      |         |     |         |   |         |   | Fisher's test<br>Cramer's V |
|---------------------------------------------------------------------------|-------------------|---------|------|---------|-------|---------|------|---------|------|---------|------|---------|------|---------|------|---------|------|---------|-----|---------|---|---------|---|-----------------------------|
| Variable                                                                  | Category          | 0T-100P |      | 10T-90P |       | 20T-80P |      | 30T-70P |      | 40T-60P |      | 50T-50P |      | 60T-40P |      | 70T-30P |      | 80T-20P |     | 90T-10P |   | 100T-0P |   | p                           |
|                                                                           |                   | n       | %    | n       | %     | n       | %    | n       | %    | n       | %    | n       | %    | n       | %    | n       | %    | n       | %   | n       | % | n       | % |                             |
| Profession                                                                | Doctor            | 0       | 0.0  | 19      | 17.8  | 27      | 25.2 | 20      | 18.7 | 12      | 11.2 | 17      | 15.9 | 8       | 7.5  | 2       | 1.9  | 2       | 1.9 | 0       | 0 | 0       | 0 | 0.005                       |
|                                                                           | Nurse             | 1       | 3.7  | 6       | 22.2  | 6       | 22.2 | 9       | 33.3 | 0       | 0.0  | 0       | 0.0  | 5       | 18.5 | 0       | 0.0  | 0       | 0.0 | 0       | 0 | 0       | 0 | -                           |
|                                                                           | Physiotherapist   | 1       | 11.1 | 4       | 44.4  | 4       | 44.4 | 0       | 0.0  | 0       | 0.0  | 0       | 0.0  | 0       | 0.0  | 0       | 0.0  | 0       | 0.0 | 0       | 0 | 0       | 0 |                             |
|                                                                           | Paramedic         | 0       | 0.0  | 3       | 100.0 | 0       | 0.0  | 0       | 0.0  | 0       | 0.0  | 0       | 0.0  | 0       | 0.0  | 0       | 0.0  | 0       | 0.0 | 0       | 0 | 0       | 0 |                             |
|                                                                           | Midwife           | 0       | 0.0  | 0       | 0.0   | 0       | 0.0  | 0       | 0.0  | 0       | 0.0  | 0       | 0.0  | 0       | 0.0  | 0       | 0.0  | 0       | 0.0 | 0       | 0 | 0       | 0 |                             |
| Medical specialization*                                                   | Family medicine   | 0       | 0.0  | 10      | 15.6  | 16      | 25.0 | 9       | 14.1 | 10      | 15.6 | 12      | 18.8 | 6       | 9.4  | 0       | 0.0  | 1       | 1.6 | 0       | 0 | 0       | 0 | 0.051                       |
|                                                                           | Internal diseases | 0       | 0.0  | 1       | 20.0  | 2       | 40.0 | 2       | 40.0 | 0       | 0.0  | 0       | 0.0  | 0       | 0.0  | 0       | 0.0  | 0       | 0.0 | 0       | 0 | 0       | 0 | 0.347                       |
|                                                                           | Pediatrics        | 0       | 0.0  | 2       | 66.7  | 0       | 0.0  | 0       | 0.0  | 1       | 33.3 | 0       | 0.0  | 0       | 0.0  | 0       | 0.0  | 0       | 0.0 | 0       | 0 | 0       | 0 |                             |
|                                                                           | Cardiology        | 0       | 0.0  | 0       | 0.0   | 1       | 50.0 | 1       | 50.0 | 0       | 0.0  | 0       | 0.0  | 0       | 0.0  | 0       | 0.0  | 0       | 0.0 | 0       | 0 | 0       | 0 |                             |
|                                                                           | Hematology        | 0       | 0.0  | 3       | 50.0  | 2       | 33.3 | 0       | 0.0  | 0       | 0.0  | 0       | 0.0  | 0       | 0.0  | 1       | 16.7 | 0       | 0.0 | 0       | 0 | 0       | 0 |                             |
|                                                                           | Anesthesiology    | 1       | 33.3 | 0       | 0.0   | 0       | 0.0  | 2       | 66.7 | 0       | 0.0  | 0       | 0.0  | 0       | 0.0  | 0       | 0.0  | 0       | 0.0 | 0       | 0 | 0       | 0 |                             |
|                                                                           | Other             | 1       | 10.0 | 4       | 40.0  | 1       | 10.0 | 3       | 30.0 | 0       | 0.0  | 0       | 0.0  | 1       | 10.0 | 0       | 0.0  | 0       | 0.0 | 0       | 0 | 0       | 0 |                             |

**Note.** p - calculated significance level in Fisher's test, p = 0 means that p < 0.001; Cramers' V - a coefficient determining the level of dependence between two nominal variables; \* - the group of respondents was limited to those who indicated only one specialization; T - percentage of teleconsultations, P - percentage of personal visits
